# Supplementary material for: Structural Analysis of an Epitope Candidate of Triosephosphate Isomerase in Opisthorchis viverrini
Source: PubMed Central journal article supplement (PMC6180082; doi:10.1038/s41598-018-33479-8), 2018-10-10
Supplement: 41598_2018_33479_MOESM1_ESM.pdf [file 41598_2018_33479_MOESM1_ESM.pdf]

1 **Structural Analysis of an Epitope Candidate of Triosephosphate Isomerase in**  
2 ***Opisthorchis viverrini***

3

4 Jonghyeon Son<sup>1,‡</sup>, Sulhee Kim<sup>1,‡</sup>, So Eun Kim<sup>1,‡</sup>, Haemin Lee<sup>1</sup>, Myoung-Ro Lee<sup>2</sup>, and Kwang Yeon  
5 Hwang<sup>1,\*</sup>

6

7 *<sup>1</sup>Division of Biotechnology, College of Life Sciences & Biotechnology, Korea University, Seoul 136-701,*  
8 *South Korea*

9 *<sup>2</sup>Division of Malaria & Parasitic Disease, Korea National Institute of Health, Osong, Republic of Korea*

10

11 ‡These authors contributed equally to this work.

12

13 \*Corresponding author. Fax: +82 (0)2 923 3229. Telephone: +82 (0)2 3290 3512. E-mail address:  
14 chahong@korea.ac.kr (K.Y. Hwang)

15

16

17

18

19

20

21

22

23

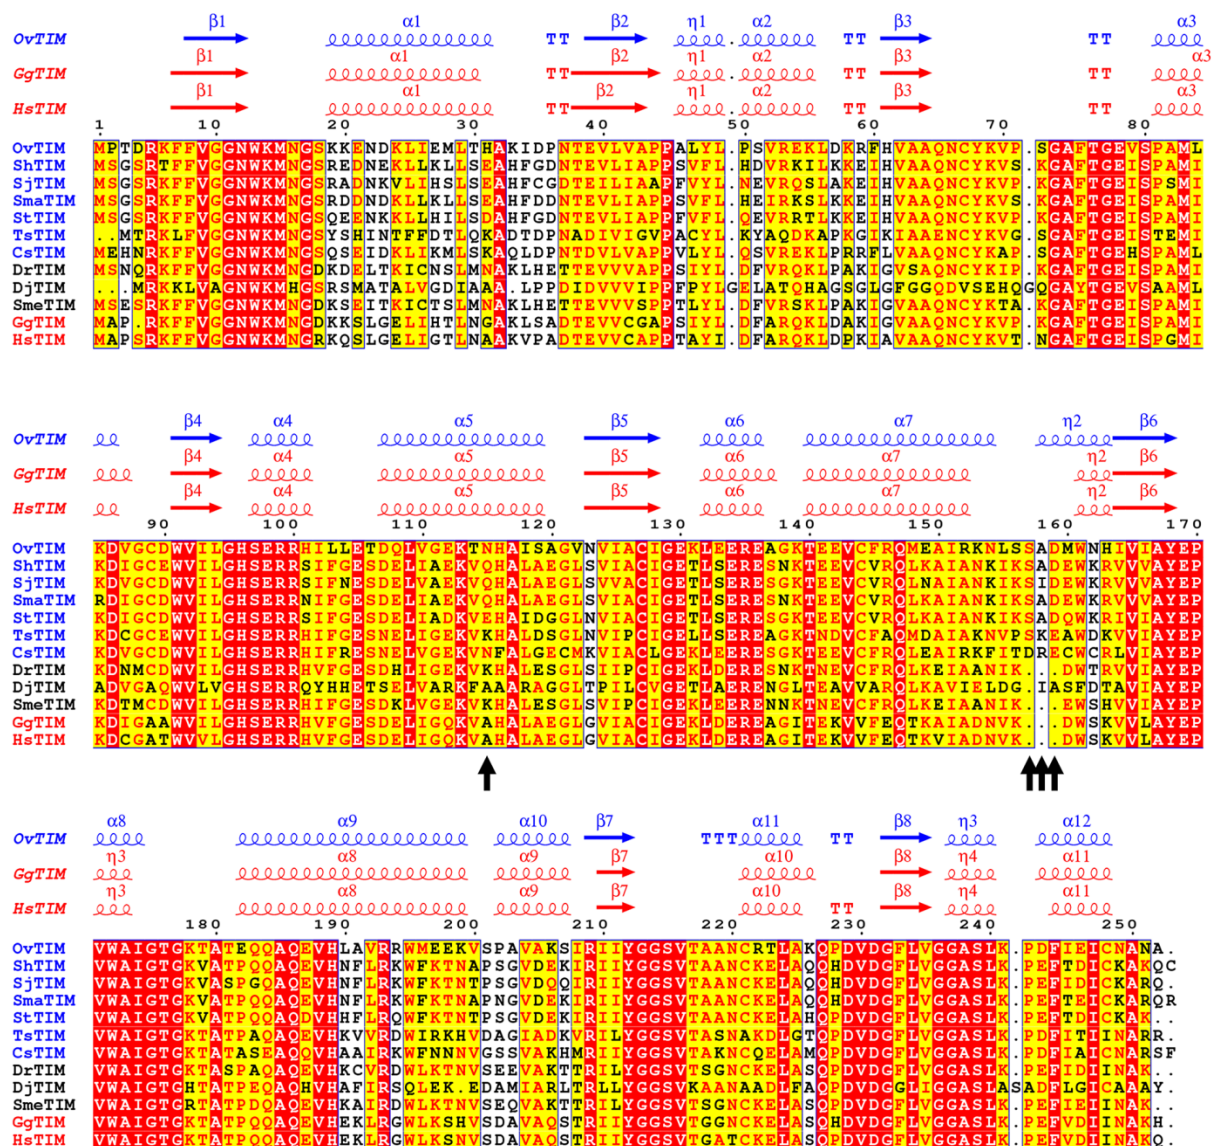

24

25 **Supplementary Figure S1.** Multiple sequence alignment of Triosephosphate isomerases (TIMs) from

26 various species. TIMs from 3 free living planarian species (labelled in *black*) and 2 vertebrates (labelled

27 in *red*) (*Dugesia ryukyuensis* (GenBank accession number BW639877), *Dugesia japonica* (GenBank

28 accession number EU288186), *Schmidtea mediterranea* (GenBank accession number DN315650),

29 *Gallus gallus* (P00940), and *Homo sapiens* (P60174-1)) are included in addition to 7 TIMs from parasite

30 trematodes (*Opisthorchis viverrini* (accession code: A0A074Z863), *Clonorchis sinensis* (accession

31 code: G7YDG0), *Schistosoma haematobium* (accession code: A5A6F9), *Schistosoma japonicum*

32 (Q27775), *Schistosoma mansoni* (P48501), *Schistosoma turkestanicum* (Q45XG1), and *Taenia solium*

33 (Q9GTX8)). The secondary structures of OvTIM, GgTIM, and HsTIM are shown in the upper side of

34 sequence. N115 and the SAD motif are highlighted as *black* arrows.

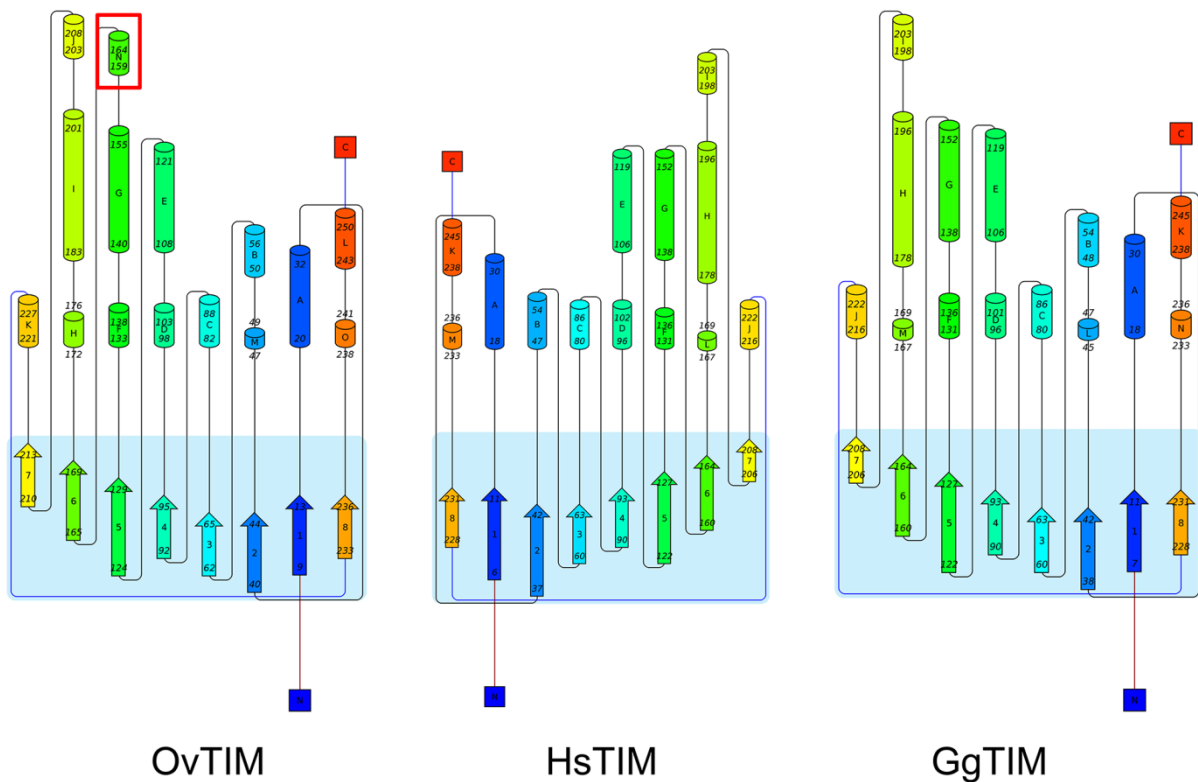

35

36 **Supplementary Figure S2.** Schematic topology of various TIMs, including OvTIM, HsTIM (PDB code:  
 37 4POC), and GgTIM (PDB code: 8TIM). The  $\alpha$ -helices and  $\beta$ -sheets, which are labelled in the  
 38 alphabetical order and the numerical order, respectively, are represented as cylinders and rectangular  
 39 arrows. The residue numbers of the beginning and end of each secondary structure are written on the  
 40 figure. The bundle of  $\beta$ -sheets is shaded in a *blue* rectangle, and the overall order of the secondary  
 41 structures is shown in a rainbow spectrum from the N-terminal end (*blue*) to C-terminal end (*red*). The  
 42  $3_{10}$ -helix N, which is represented as  $3_{10}$ -helix  $\gamma_2$  in the manuscript, is designated as a *red* box.

43

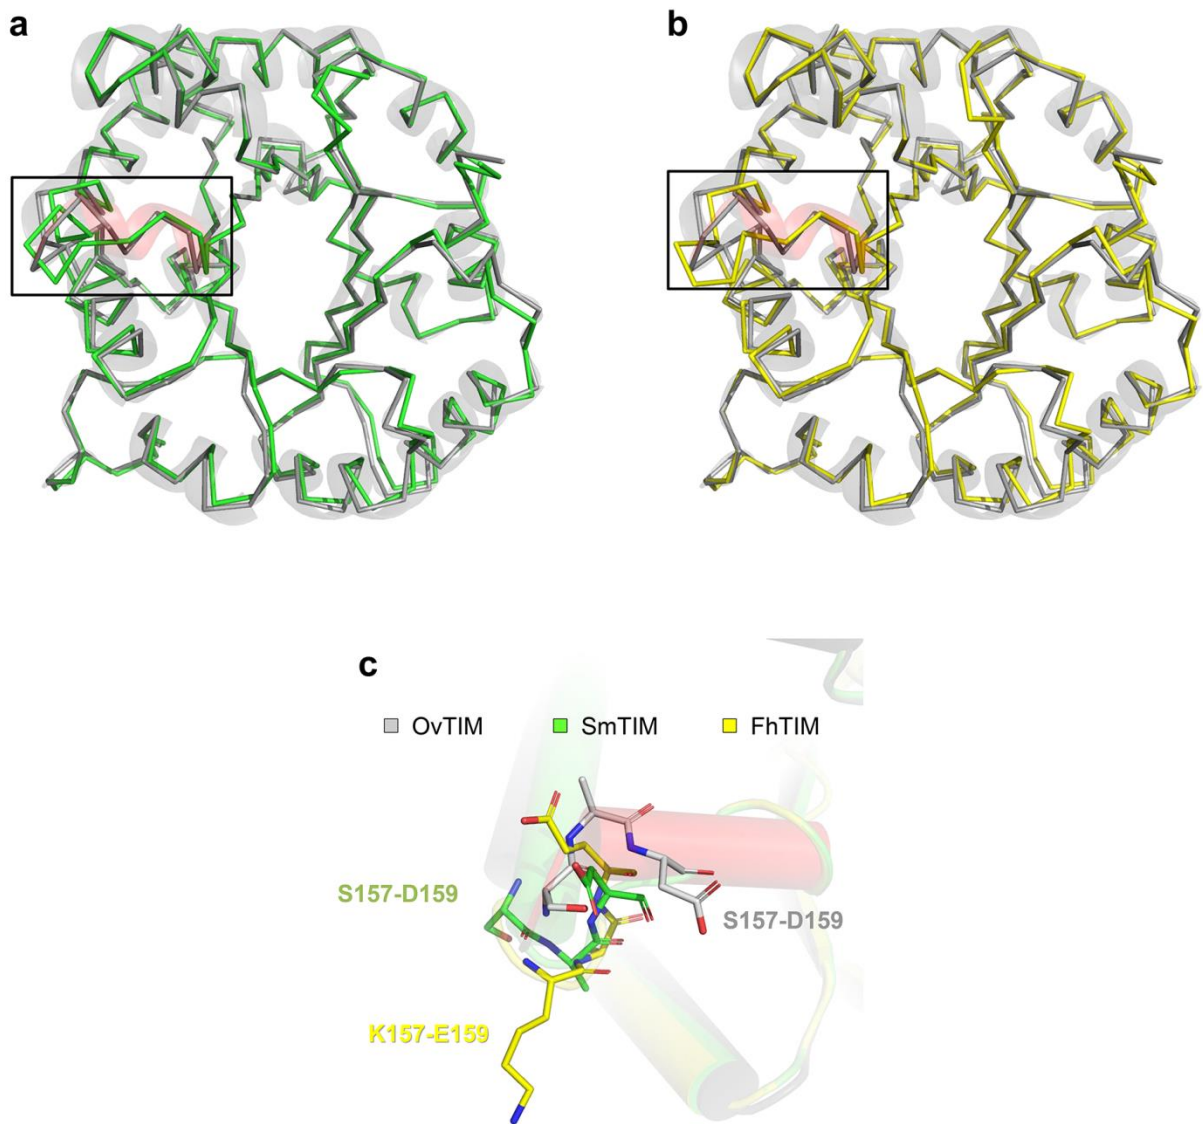

44

45 **Supplementary Figure S3.** (a, b) Superposition of OvTIM (*grey*) with *in silico* models of TIMs from  
 46 *Schistosoma mansoni* (SmTIM, *green*) and *Fasciola hepatica* (FhTIM, *yellow*). Ca of three structures  
 47 are represented as ribbon models and the cartoon model of OvTIM is additionally shaded as *black*  
 48 colour for the visualization of the secondary structure. The SAD motif and 3<sub>10</sub>-helix of OvTIM are  
 49 designated as *black* box and highlighted as *red* colour. (c) Enlarged view of SxD/E motifs of three  
 50 structures. The motifs are represented as stick models.

51

52

53

| No | Name | Score | No | Name | Score | No | Name | Score | No  | Name | Score | No  | Name | Score |
|----|------|-------|----|------|-------|----|------|-------|-----|------|-------|-----|------|-------|
| 5  | ARG  | 0.642 | 33 | LYS  | 0.970 | 61 | HIS  | 0.341 | 89  | CYS  | 0.217 | 117 | ALA  | 0.268 |
| 6  | LYS  | 0.606 | 34 | ILE  | 0.774 | 62 | VAL  | 0.217 | 90  | ASP  | 0.341 | 118 | ILE  | 0.394 |
| 7  | PHE  | 0.522 | 35 | ASP  | 0.809 | 63 | ALA  | 0.063 | 91  | TRP  | 0.217 | 119 | SER  | 0.555 |
| 8  | PHE  | 0.321 | 36 | PRO  | 0.882 | 64 | ALA  | 0.028 | 92  | VAL  | 0.051 | 120 | ALA  | 0.441 |
| 9  | VAL  | 0.341 | 37 | ASN  | 0.809 | 65 | GLN  | 0.014 | 93  | ILE  | 0.033 | 121 | GLY  | 0.441 |
| 10 | GLY  | 0.195 | 38 | THR  | 0.581 | 66 | ASN  | 0.006 | 94  | LEU  | 0.051 | 122 | VAL  | 0.244 |
| 11 | GLY  | 0.167 | 39 | GLU  | 0.441 | 67 | CYS  | 0.033 | 95  | GLY  | 0.079 | 123 | ASN  | 0.295 |
| 12 | ASN  | 0.079 | 40 | VAL  | 0.394 | 68 | TYR  | 0.063 | 96  | HIS  | 0.063 | 124 | VAL  | 0.167 |
| 13 | TRP  | 0.195 | 41 | LEU  | 0.195 | 69 | LYS  | 0.217 | 97  | SER  | 0.142 | 125 | ILE  | 0.120 |
| 14 | LYS  | 0.110 | 42 | VAL  | 0.217 | 70 | VAL  | 0.244 | 98  | GLU  | 0.079 | 126 | ALA  | 0.167 |
| 15 | MET  | 0.079 | 43 | ALA  | 0.079 | 71 | PRO  | 0.321 | 99  | ARG  | 0.016 | 127 | CYS  | 0.120 |
| 16 | ASN  | 0.217 | 44 | PRO  | 0.079 | 72 | SER  | 0.295 | 100 | ARG  | 0.167 | 128 | ILE  | 0.295 |
| 17 | GLY  | 0.268 | 45 | PRO  | 0.051 | 73 | GLY  | 0.167 | 101 | HIS  | 0.268 | 129 | GLY  | 0.368 |
| 18 | SER  | 0.441 | 46 | ALA  | 0.033 | 74 | ALA  | 0.142 | 102 | ILE  | 0.142 | 130 | GLU  | 0.581 |
| 19 | LYS  | 0.555 | 47 | LEU  | 0.079 | 75 | PHE  | 0.110 | 103 | LEU  | 0.045 | 131 | LYS  | 0.581 |
| 20 | LYS  | 0.774 | 48 | TYR  | 0.195 | 76 | THR  | 0.016 | 104 | LEU  | 0.167 | 132 | LEU  | 0.843 |
| 21 | GLU  | 0.581 | 49 | LEU  | 0.120 | 77 | GLY  | 0.000 | 105 | GLU  | 0.063 | 133 | GLU  | 0.949 |
| 22 | ASN  | 0.394 | 50 | PRO  | 0.268 | 78 | GLU  | 0.008 | 106 | THR  | 0.268 | 134 | GLU  | 0.726 |
| 23 | ASP  | 0.774 | 51 | SER  | 0.441 | 79 | VAL  | 0.016 | 107 | ASP  | 0.368 | 135 | ARG  | 0.843 |
| 24 | LYS  | 0.809 | 52 | VAL  | 0.341 | 80 | SER  | 0.120 | 108 | GLN  | 0.482 | 136 | GLU  | 0.990 |
| 25 | LEU  | 0.522 | 53 | ARG  | 0.441 | 81 | PRO  | 0.167 | 109 | LEU  | 0.142 | 137 | ALA  | 0.998 |
| 26 | ILE  | 0.642 | 54 | GLU  | 0.606 | 82 | ALA  | 0.295 | 110 | VAL  | 0.167 | 138 | GLY  | 0.980 |
| 27 | GLU  | 0.949 | 55 | LYS  | 0.642 | 83 | MET  | 0.134 | 111 | GLY  | 0.321 | 139 | LYS  | 0.949 |
| 28 | MET  | 0.726 | 56 | LEU  | 0.555 | 84 | LEU  | 0.134 | 112 | GLU  | 0.341 | 140 | THR  | 0.726 |
| 29 | LEU  | 0.606 | 57 | ASP  | 0.774 | 85 | LYS  | 0.394 | 113 | LYS  | 0.110 | 141 | GLU  | 0.882 |
| 30 | THR  | 0.882 | 58 | LYS  | 0.726 | 86 | ASP  | 0.394 | 114 | THR  | 0.244 | 142 | GLU  | 0.911 |
| 31 | HIS  | 0.980 | 59 | ARG  | 0.642 | 87 | VAL  | 0.295 | 115 | ASN  | 0.482 | 143 | VAL  | 0.606 |
| 32 | ALA  | 0.911 | 60 | PHE  | 0.522 | 88 | GLY  | 0.368 | 116 | HIS  | 0.321 | 144 | CYS  | 0.522 |

| No         | Name       | Score        | No  | Name | Score | No  | Name | Score | No  | Name | Score |
|------------|------------|--------------|-----|------|-------|-----|------|-------|-----|------|-------|
| 145        | PHE        | 0.726        | 179 | THR  | 0.882 | 209 | ARG  | 0.441 | 239 | SER  | 0.321 |
| 146        | ARG        | 0.606        | 180 | ALA  | 0.703 | 210 | ILE  | 0.441 | 240 | LEU  | 0.441 |
| 147        | GLN        | 0.394        | 181 | THR  | 0.843 | 211 | ILE  | 0.268 | 241 | LYS  | 0.642 |
| 148        | MET        | 0.482        | 182 | GLU  | 0.809 | 212 | TYR  | 0.394 | 242 | PRO  | 0.809 |
| 149        | GLU        | 0.726        | 183 | GLN  | 0.911 | 213 | GLY  | 0.268 | 243 | ASP  | 0.726 |
| 150        | ALA        | 0.502        | 184 | GLN  | 0.809 | 214 | GLY  | 0.368 | 244 | PHE  | 0.482 |
| 151        | ILE        | 0.394        | 185 | ALA  | 0.606 | 215 | SER  | 0.522 | 245 | ILE  | 0.703 |
| 152        | ARG        | 0.774        | 186 | GLN  | 0.726 | 216 | VAL  | 0.482 | 246 | GLU  | 0.843 |
| 153        | LYS        | 0.726        | 187 | GLU  | 0.843 | 217 | THR  | 0.673 | 247 | ILE  | 0.522 |
| 154        | ASN        | 0.555        | 188 | VAL  | 0.606 | 218 | ALA  | 0.809 | 248 | CYS  | 0.555 |
| 155        | LEU        | 0.606        | 189 | HIS  | 0.522 | 219 | ALA  | 0.882 | 249 | ASN  | 0.774 |
| 156        | SER        | 0.809        | 190 | LEU  | 0.809 | 220 | ASN  | 0.703 | 250 | ALA  | 0.703 |
| <b>157</b> | <b>SER</b> | <b>0.882</b> | 191 | ALA  | 0.774 | 221 | CYS  | 0.673 | 251 | ASN  | 0.726 |
| <b>158</b> | <b>ALA</b> | <b>0.843</b> | 192 | VAL  | 0.581 | 222 | ARG  | 0.843 | 252 | ALA  | 0.911 |
| <b>159</b> | <b>ASP</b> | <b>0.843</b> | 193 | ARG  | 0.673 | 223 | THR  | 0.843 |     |      |       |
| 160        | MET        | 0.581        | 194 | ARG  | 0.949 | 224 | LEU  | 0.606 |     |      |       |
| 161        | TRP        | 0.555        | 195 | TRP  | 0.774 | 225 | ALA  | 0.642 |     |      |       |
| 162        | ASN        | 0.673        | 196 | MET  | 0.703 | 226 | LYS  | 0.882 |     |      |       |
| 163        | HIS        | 0.502        | 197 | GLU  | 0.970 | 227 | GLN  | 0.726 |     |      |       |
| 164        | ILE        | 0.341        | 198 | GLU  | 0.990 | 228 | PRO  | 0.774 |     |      |       |
| 165        | VAL        | 0.244        | 199 | LYS  | 0.949 | 229 | ASP  | 0.642 |     |      |       |
| 166        | ILE        | 0.321        | 200 | VAL  | 0.911 | 230 | VAL  | 0.522 |     |      |       |
| 167        | ALA        | 0.217        | 201 | SER  | 0.949 | 231 | ASP  | 0.502 |     |      |       |
| 168        | TYR        | 0.394        | 202 | PRO  | 0.970 | 232 | GLY  | 0.368 |     |      |       |
| 169        | GLU        | 0.217        | 203 | ALA  | 0.937 | 233 | PHE  | 0.368 |     |      |       |
| 170        | PRO        | 0.482        | 204 | VAL  | 0.726 | 234 | LEU  | 0.142 |     |      |       |
| 171        | VAL        | 0.441        | 205 | ALA  | 0.726 | 235 | VAL  | 0.268 |     |      |       |
| 172        | TRP        | 0.673        | 206 | LYS  | 0.911 | 236 | GLY  | 0.268 |     |      |       |
| 173        | ALA        | 0.606        | 207 | SER  | 0.673 | 237 | GLY  | 0.394 |     |      |       |
| 178        | LYS        | 0.937        | 208 | ILE  | 0.522 | 238 | ALA  | 0.482 |     |      |       |

57 **Supplementary Figure S4.** The possible epitopes of the OvTIM dimer structure were predicted with  
58 the ElliPro web server using the following input parameters: Minimum score (0.6) and Maximum  
59 distance (6 Å). For clarity, the individual epitope prediction scores for one protomer in OvTIM are listed  
60 above. The scores of the SAD motif are highlighted in *red*.

61

62

63

64

65

66

67

68

69

70

71

72

73

74

75

76

77

78

79

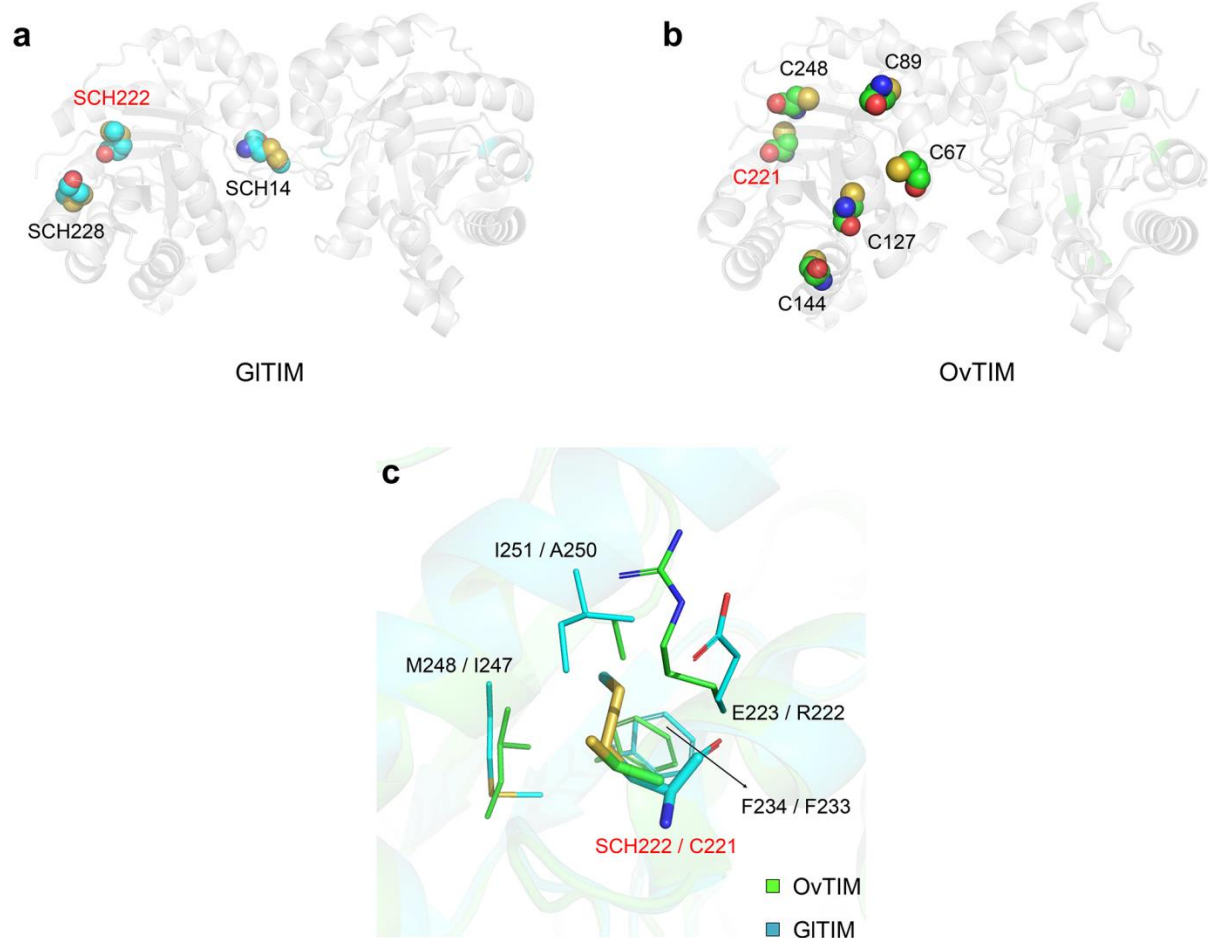

80

81

82 **Supplementary Figure S5.** (a) Derivatized Cys residues (SCH) of chemically modified *Giardia lamblia*  
 83 TIM structure (PDB entry: 3PF3) are represented as *cyan* sphere models and SCH222 residue is  
 84 labelled as *red* colour. (b) Cys residues that can be chemically modified in OvTIM are represented as  
 85 *green* sphere models and C221 residue is labelled as *red* colour. (a, b) For clarity, the residues of only  
 86 one protomer are shown and those of another protomer are highlighted in cartoon model. (c)  
 87 Superposition of GITIM with OvTIM. The SCH222 of GITIM and C221 of OvTIM are represented as  
 88 thick stick models and the surrounding residues that form the hydrophobic pocket are represented as  
 89 relatively thin stick model. The labels of residues are written in GITIM / OvTIM order.

90

91

92



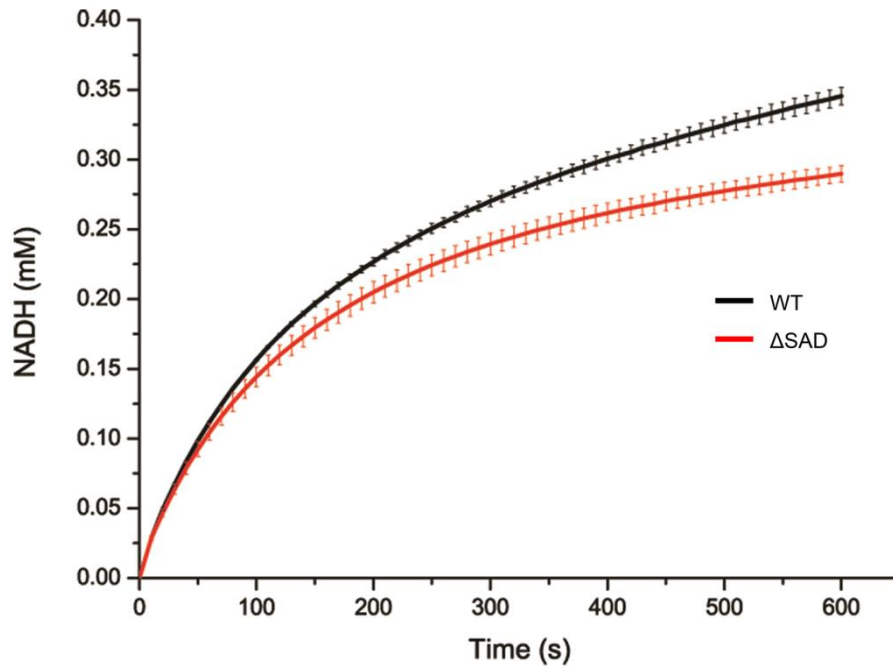

93

94

95 **Supplementary Figure S6.** Comparison of catalytic activity between wild-type and  $\Delta$ SAD variant of  
96 OvTIM. Final reaction mixture contains 0.4 mM dihydroxyacetone phosphate (DHAP) and 0.018 mM  
97 OvTIM dimer. The measurement was conducted at 27 °C and 2 sets of activity curve are averaged and  
98 plotted.

99
